# Supplementary material for: A three-dimensional metal–organic framework with a distorted Kagome related layer showing canted antiferromagnetic behaviour
Source: Royal Society of Chemistry journal article supplement (doi:10.1039/b715314g), 2008-01-01
Supplement: b715314g.pdf [file b715314g.pdf]

Supplementary Material (ESI) for Chemical Communications  
This journal is (c) The Royal Society of Chemistry 2007

**A three-dimensional metal-organic framework with a distorted  
Kagome related layer showing canted antiferromagnetic  
behaviour**

Partha Mahata,<sup>a</sup> Diptiman Sen<sup>b</sup> and Srinivasan Natarajan<sup>a\*</sup>

<sup>a</sup> Framework Solids Laboratory, Solid State and Structural Chemistry Unit, Indian Institute of Science,  
Bangalore 560 012, India E-mail: [snatarajan@sscu.iisc.ernet.in](mailto:snatarajan@sscu.iisc.ernet.in)

<sup>b</sup> Centre for High Energy Physics, Indian Institute of Science, Bangalore 560 012, India

**ELECTRONIC SUPPLEMENTARY INFORMATION**

**Table S1:** Crystal data and structure refinement parameters for  $[\text{Mn}_3\{\text{C}_6\text{H}_3(\text{COO})_3\}_2]$ 

|                                            |                                                   |
|--------------------------------------------|---------------------------------------------------|
| Empirical formula                          | $\text{C}_{18}\text{H}_6\text{O}_{12}\text{Mn}_3$ |
| Formula weight                             | 579.04                                            |
| Crystal system                             | Monoclinic                                        |
| Space group                                | $P2_1/n$ (no. 14)                                 |
| a (Å)                                      | 11.314(3)                                         |
| b (Å)                                      | 6.5962(16)                                        |
| c (Å)                                      | 11.391(3)                                         |
| $\alpha$ (deg)                             | 90.0                                              |
| $\beta$ (deg)                              | 111.029(4)                                        |
| $\gamma$ (deg)                             | 90.0                                              |
| Volume (Å <sup>3</sup> )                   | 793.5(3)                                          |
| Z                                          | 2                                                 |
| T (K)                                      | 273(2)                                            |
| $\rho_{\text{calc}}$ (g cm <sup>-3</sup> ) | 2.424                                             |
| $\mu$ (mm <sup>-1</sup> )                  | 2.435                                             |
| $\theta$ range (deg)                       | 2.18 to 27.97                                     |
| $\lambda$ (Mo K $\alpha$ ) (Å)             | 0.71073                                           |
| R indices [ $I > 2\sigma(I)$ ]             | $R_1 = 0.0337$ , $wR_2 = 0.0680$                  |
| R indices (all data)                       | $R_1 = 0.0425$ , $wR_2 = 0.0714$                  |

$R_1 = \Sigma ||F_0| - |F_c|| / \Sigma |F_0|$ ;  $wR_2 = \{\Sigma [w(F_0^2 - F_c^2)^2] / \Sigma [w(F_0^2)^2]\}^{1/2}$ .  $w = 1/[\sigma^2(F_0)^2 + (aP)^2 + bP]$ ,  $P = [\max.(F_0^2, 0) + 2(F_c^2)]/3$ , where  $a = 0.0263$  and  $b = 0.9220$

**Table S2:** Selected bond distances (Å) observed in  $[\text{Mn}_3\{\text{C}_6\text{H}_3(\text{COO})_3\}_2]$ 

| Bond         | Distances, Å | Bond         | Distances, Å |
|--------------|--------------|--------------|--------------|
| Mn(1)-O(1)#1 | 2.097(2)     | Mn(2)-O(6)#5 | 2.0845(19)   |
| Mn(1)-O(2)#2 | 2.1376(19)   | Mn(2)-O(6)#1 | 2.0845(19)   |
| Mn(1)-O(5)#3 | 2.202(2)     | Mn(2)-O(3)   | 2.1804(19)   |
| Mn(1)-O(3)   | 2.2700(19)   | Mn(2)-O(3)#6 | 2.1804(19)   |
| Mn(1)-O(4)#4 | 2.3229(19)   | Mn(2)-O(4)   | 2.1819(19)   |
| Mn(1)-O(5)#4 | 2.3776(19)   | Mn(2)-O(4)#6 | 2.1819(19)   |

Symmetry operations used to generate equivalent atoms for **I**: #1  $x+1/2, -y+1/2, z-1/2$  #2  $-x+1/2, y-1/2, z+1/2$  #3  $-x+1, -y+1, -z+1$  #4  $x-1/2, -y+1/2, z-1/2$  #5  $-x+1/2, y-1/2, -z+3/2$  #6  $-x+1, -y, -z+1$

**Table S3:** Selected bond angle observed in  $[\text{Mn}_3\{\text{C}_6\text{H}_3(\text{COO})_3\}_2]$ 

| Angle               | Amplitude (°) | Angle                | Amplitude |
|---------------------|---------------|----------------------|-----------|
| O(1)#1-Mn(1)-O(2)#2 | 83.42(8)      | O(6)#1-Mn(2)-O(3)    | 87.96(8)  |
| O(1)#1-Mn(1)-O(5)#3 | 91.23(8)      | O(6)#5-Mn(2)-O(3)#6  | 87.96(8)  |
| O(2)#2-Mn(1)-O(5)#3 | 130.30(8)     | O(6)#1-Mn(2)-O(3)#6  | 92.04(8)  |
| O(1)#1-Mn(1)-O(3)   | 99.18(7)      | O(3)-Mn(2)-O(3)#6    | 180.0     |
| O(2)#2-Mn(1)-O(3)   | 147.08(8)     | O(6)#5-Mn(2)-O(4)    | 95.11(8)  |
| O(5)#3-Mn(1)-O(3)   | 82.59(7)      | O(6)#1-Mn(2)-O(4)    | 84.89(8)  |
| O(1)#1-Mn(1)-O(4)#4 | 156.12(8)     | O(3)-Mn(2)-O(4)      | 85.61(7)  |
| O(2)#2-Mn(1)-O(4)#4 | 87.50(7)      | O(3)#6-Mn(2)-O(4)    | 94.39(7)  |
| O(5)#3-Mn(1)-O(4)#4 | 77.94(7)      | O(6)#5-Mn(2)-O(4)#6  | 84.89(8)  |
| O(3)-Mn(1)-O(4)#4   | 100.41(7)     | O(6)#1-Mn(2)-O(4)#6  | 95.11(8)  |
| O(1)#1-Mn(1)-O(5)#4 | 143.87(7)     | O(3)-Mn(2)-O(4)#6    | 94.39(7)  |
| O(2)#2-Mn(1)-O(5)#4 | 81.77(7)      | O(3)#6-Mn(2)-O(4)#6  | 85.61(7)  |
| O(5)#3-Mn(1)-O(5)#4 | 123.18(6)     | O(4)-Mn(2)-O(4)#6    | 180.0     |
| O(3)-Mn(1)-O(5)#4   | 77.05(7)      | Mn(2)-O(3)-Mn(1)     | 97.88(7)  |
| O(4)#4-Mn(1)-O(5)#4 | 55.19(6)      | Mn(2)-O(4)-Mn(1)#9   | 130.53(8) |
| O(6)#5-Mn(2)-O(6)#1 | 180.0         | Mn(1)#3-O(5)-Mn(1)#9 | 112.28(8) |
| O(6)#5-Mn(2)-O(3)   | 92.04(8)      |                      |           |

Symmetry operations used to generate equivalent atoms for **1**: #1  $x+1/2, -+1/2, z-1/2$  #2  $-x+1/2, y-1/2, -z+1/2$

#3  $-x+1, -y+1, -z+1$  #4  $x-1/2, -y+1/2, z-1/2$  #5  $-x+1/2, y-1/2, -z+3/2$  #6  $-x+1, -y, -z+1$  #9  $x+1/2, -y+1/2, z+1/2$

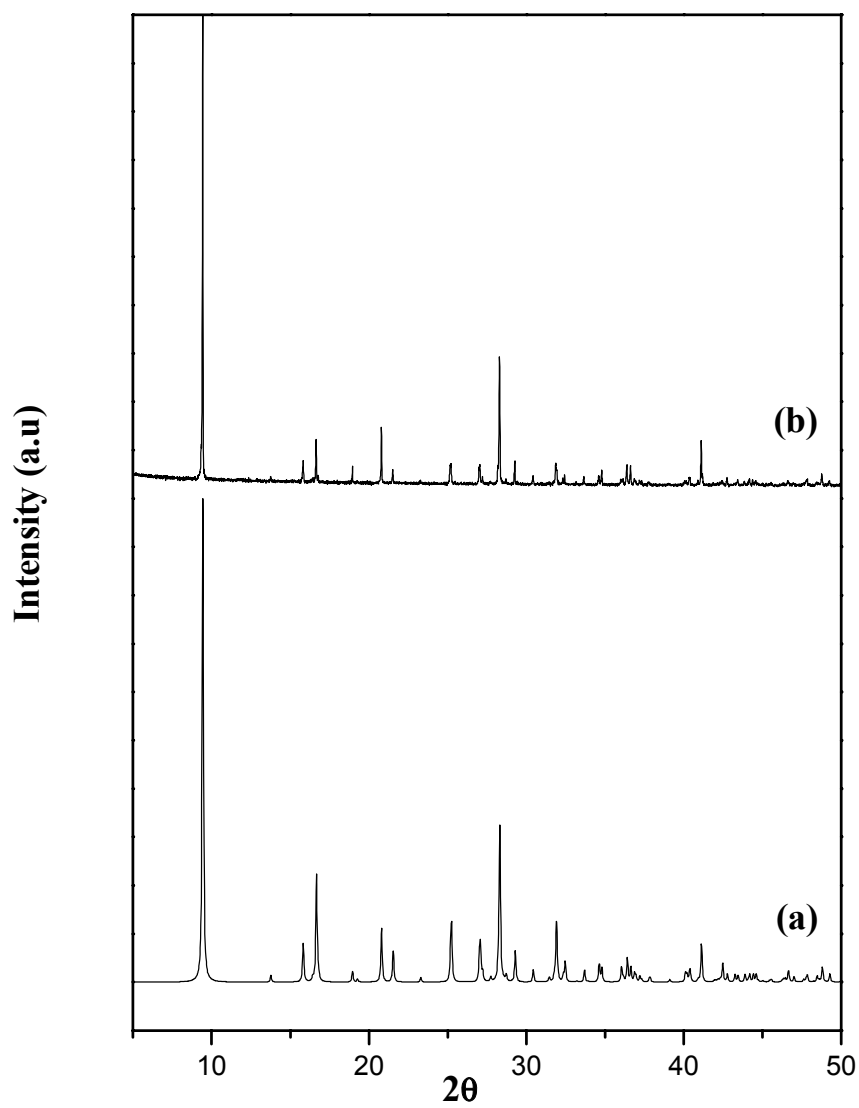

Fig. S1: Powder XRD ( $\text{CuK}\alpha$ ) pattern of  $[\text{Mn}_3\{\text{C}_6\text{H}_3(\text{COO})_3\}_2]$ , (a) simulated and (b) experimental

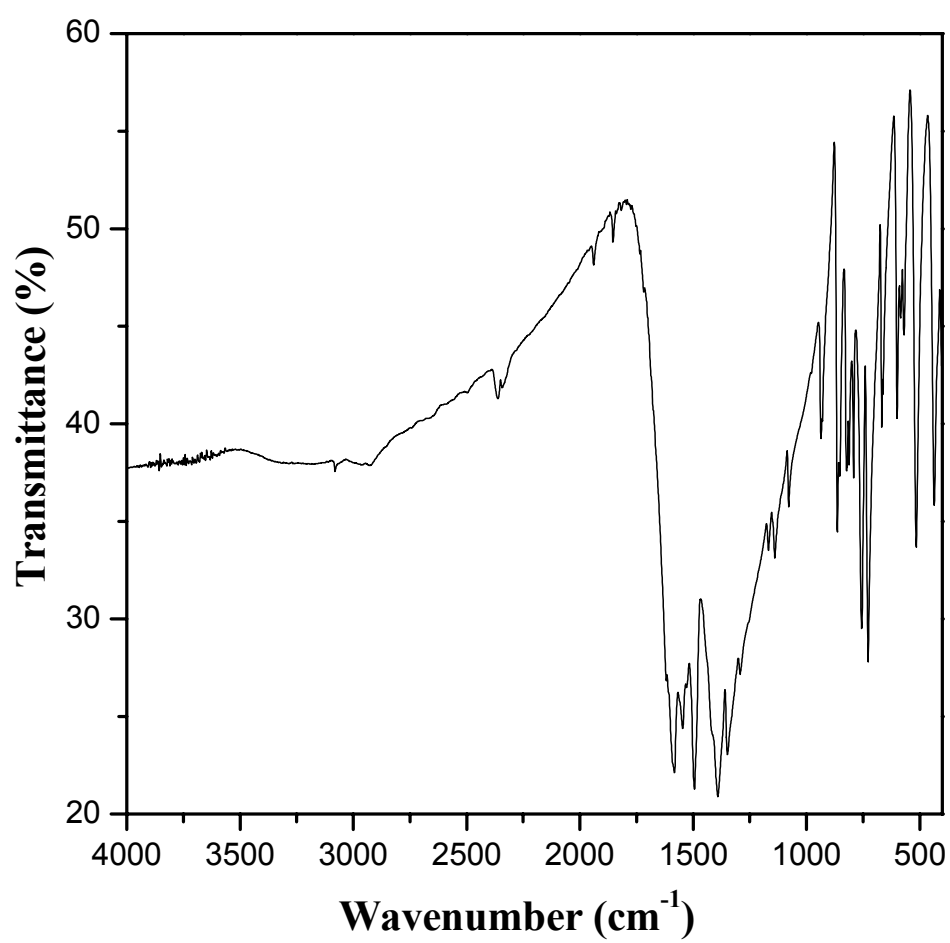

Fig. S2: IR spectra of  $[\text{Mn}_3\{\text{C}_6\text{H}_3(\text{COO})_3\}_2]$

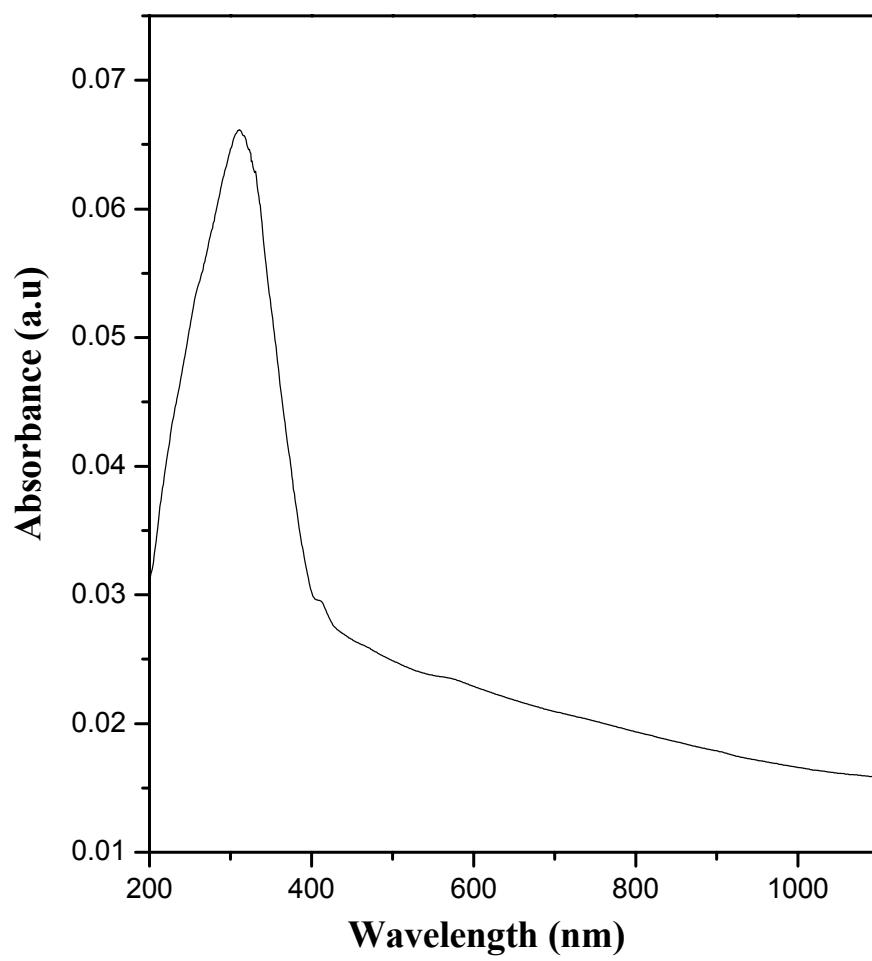

Fig. S3: UV spectra of  $[\text{Mn}_3\{\text{C}_6\text{H}_3(\text{COO})_3\}_2]$

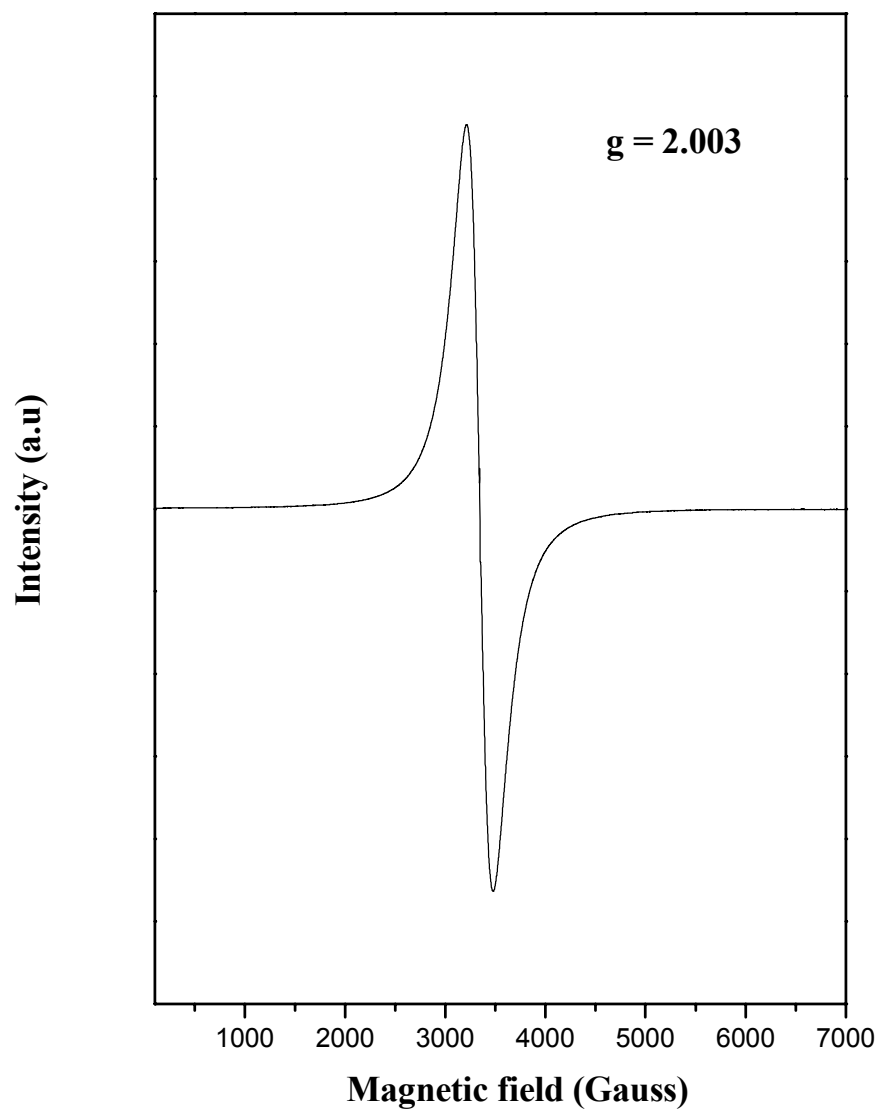

Fig. S4: EPR spectra of  $[\text{Mn}_3\{\text{C}_6\text{H}_3(\text{COO})_3\}_2]$



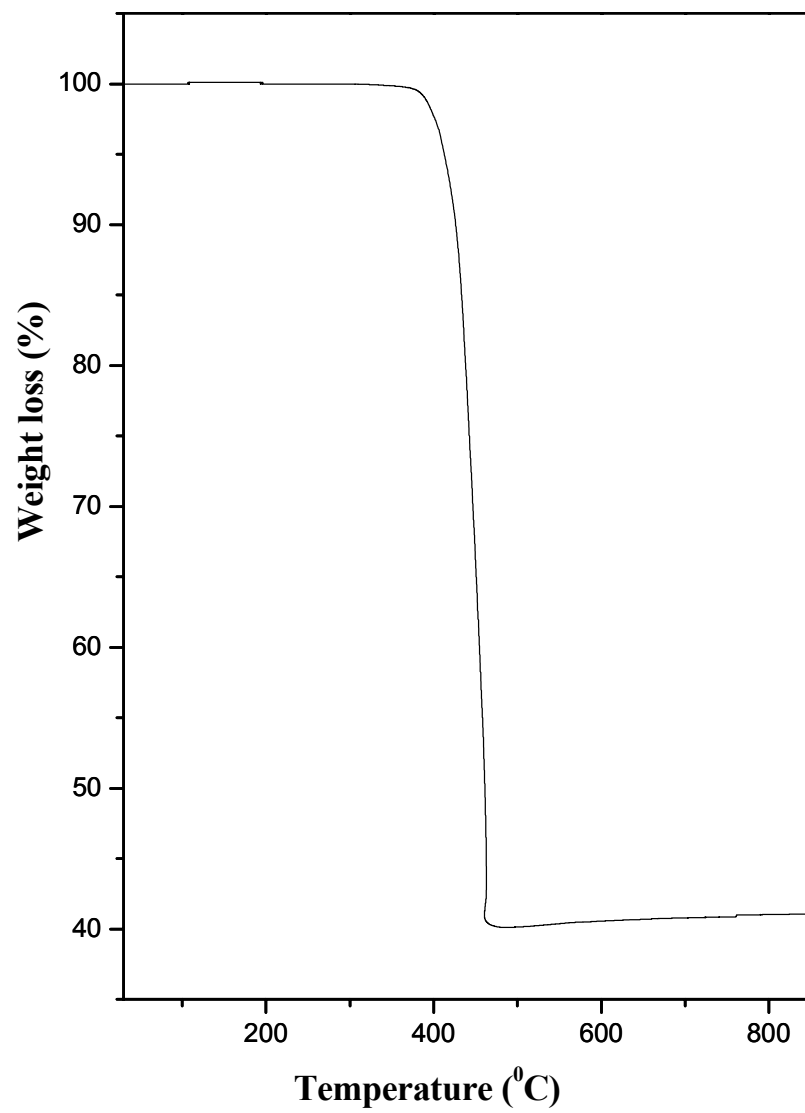

Fig. S5: TGA studies of  $[\text{Mn}_3\{\text{C}_6\text{H}_3(\text{COO})_3\}_2]$  in air

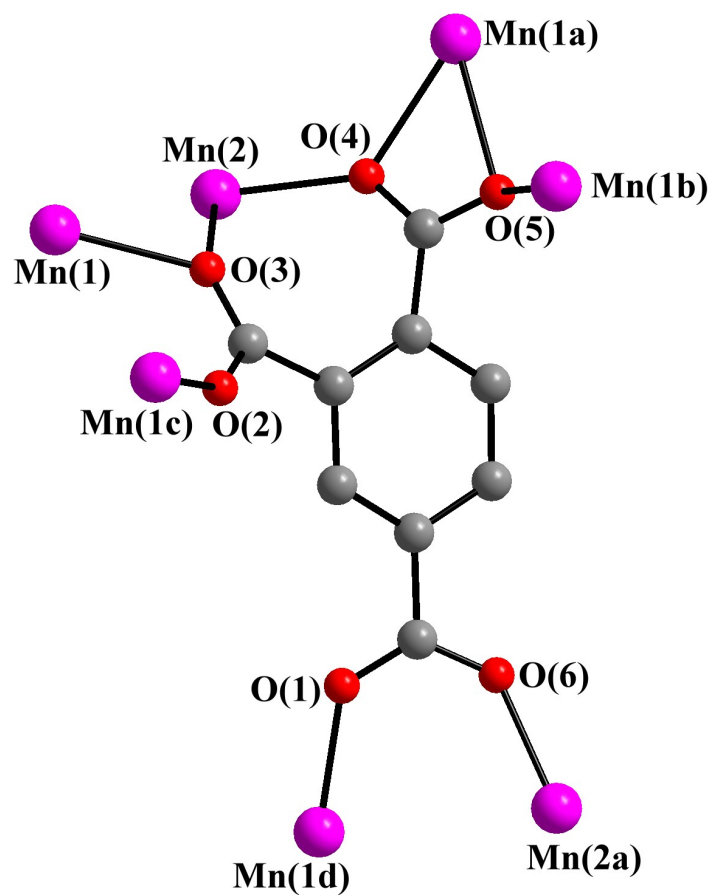

Fig. S7: Figure shows the coordination mode of trimillitate anions in  $[\text{Mn}_3\{\text{C}_6\text{H}_3(\text{COO})_3\}_2]$ , Symmetry operation:  
 Mn(1a)  $x+1/2, -y+1/2, z+1/2$ , Mn(1b)  $-x+1, -y+1, -z+1$ , Mn(1c)  $-x+1/2, y+1/2, -z+1/2$ , Mn(1d)  $x-1/2, -y+1/2, z+1/2$ ,  
 Mn(2a)  $-x+1/2, y+1/2, -z+3/2$

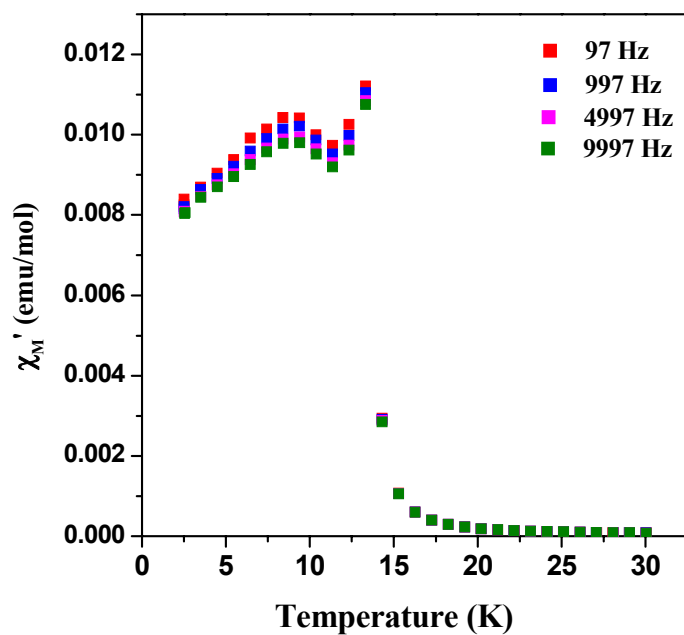

(a)

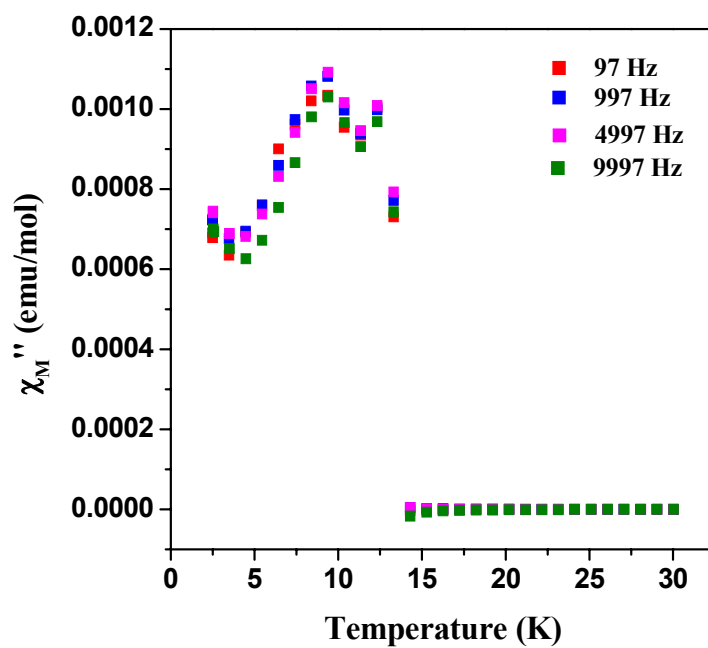

(b)

Fig. S8: Frequency dependence of the AC molar magnetic susceptibility of  $[\text{Mn}_3\{\text{C}_6\text{H}_3(\text{COO})_3\}_2]$  (a) in-phase signal, (b) out-of-phase signal. Note that the transition at around 13 K in both cases.
